# Supplementary material for: Development of PCR-Based Marker for Resistance to Fusarium wilt Race 2 in Lettuce (Lactuca Sativa L.)
Source: Research Square preprint supplement (doi:10.21203/rs.3.rs-284934/v1), 2021-03-15
Supplement: Supplementary file 1 [file b089dc34e9c4ff26e07c9e29.docx]

Table S1. Polymorphisms in the predicted genes between *LG1_116453465* and *LG1_117977450*.


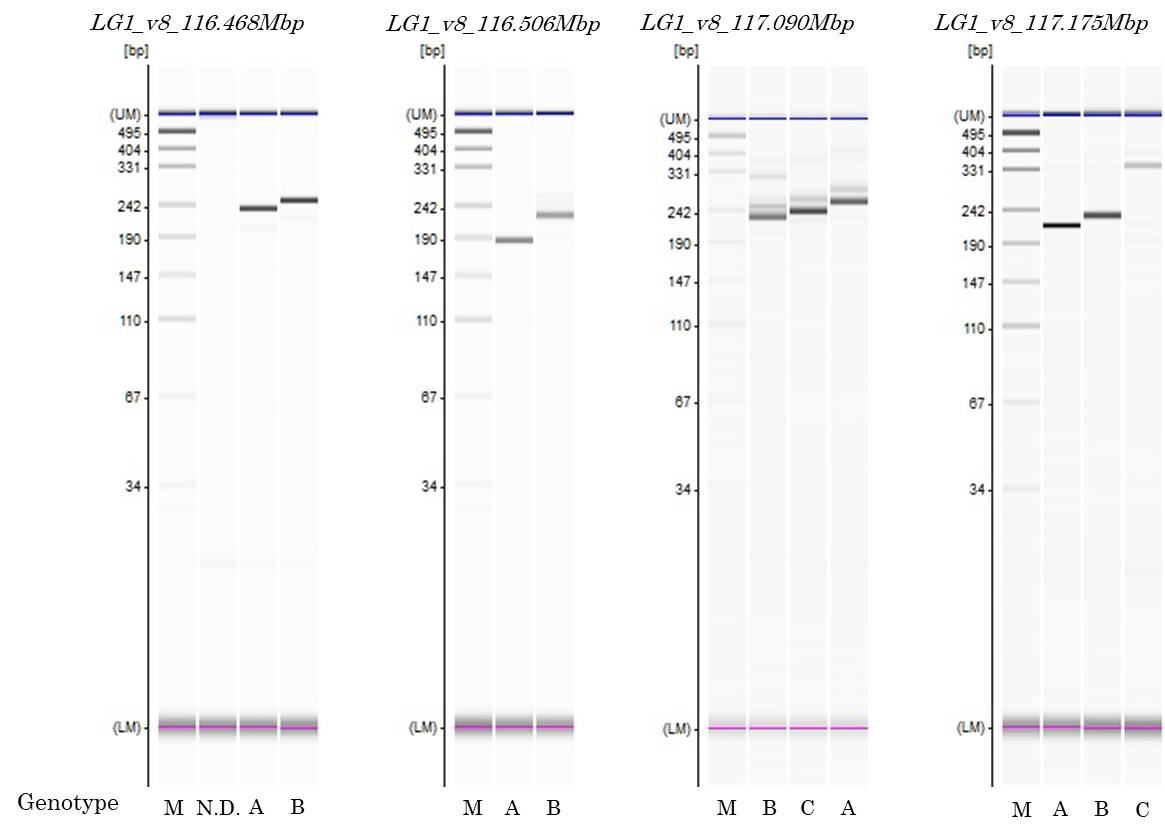


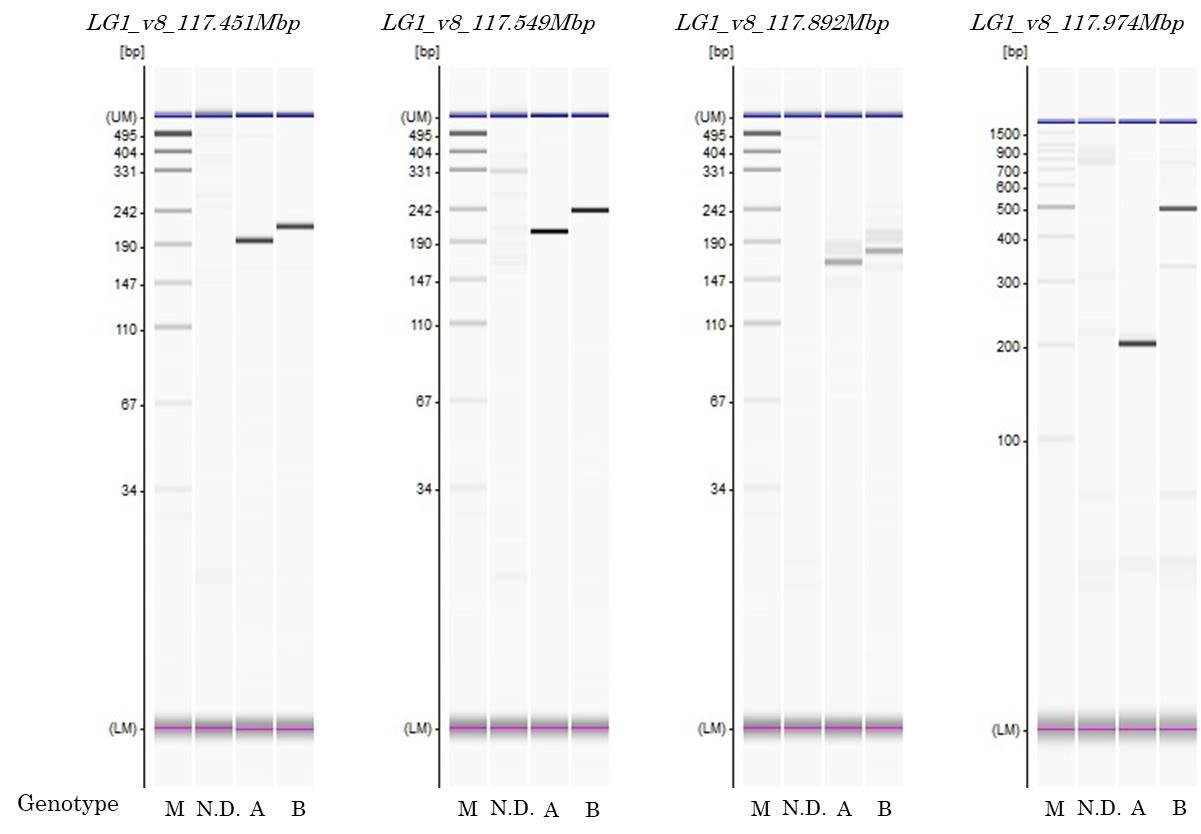


Fig. S1.

**The genotype profiles of amplification products of PCR-based markers in *qFOL1.2* by capillary electrophoresis on a MCE202 MultiNA.**

“A” indicates the genotype of ‘VI185’. “B” indicates the genotype of ‘ShinanoGreen’. “C” indicates the genotype other than “A” or “B”. “N. D.” indicates No Band. “M” indicates ladder marker.
